# Supplementary material
Source: PubMed Central journal article supplement (PMC4594623)
Supplement: chest_148_4_1034_ds01.pdf [file chest_148_4_1034_ds01.pdf]

# The Idiopathic Pulmonary Fibrosis Clinical Research Network (IPFnet)

## Diagnostic and Adjudication Processes

*Joao de Andrade, MD; Marvin Schwarz, MD; Harold R. Collard, MD; Tedryl Gentry-Bumpass, BSBE; Thomas Colby, MD; David Lynch, MD; and Robert J. Kaner, MD; for the IPFnet Investigators*

CHEST 2015; 148(4):1034-1042

### e-Appendix 1. Chest CT Images

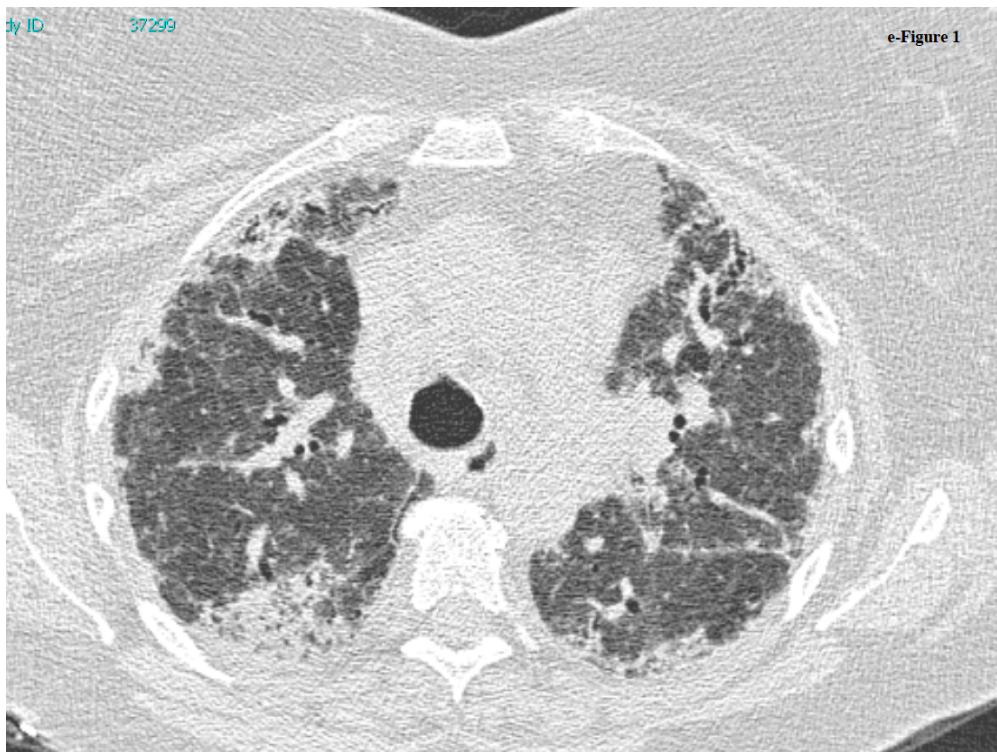

**e-Figure 1.**

*Online supplements are not copyedited prior to posting.*

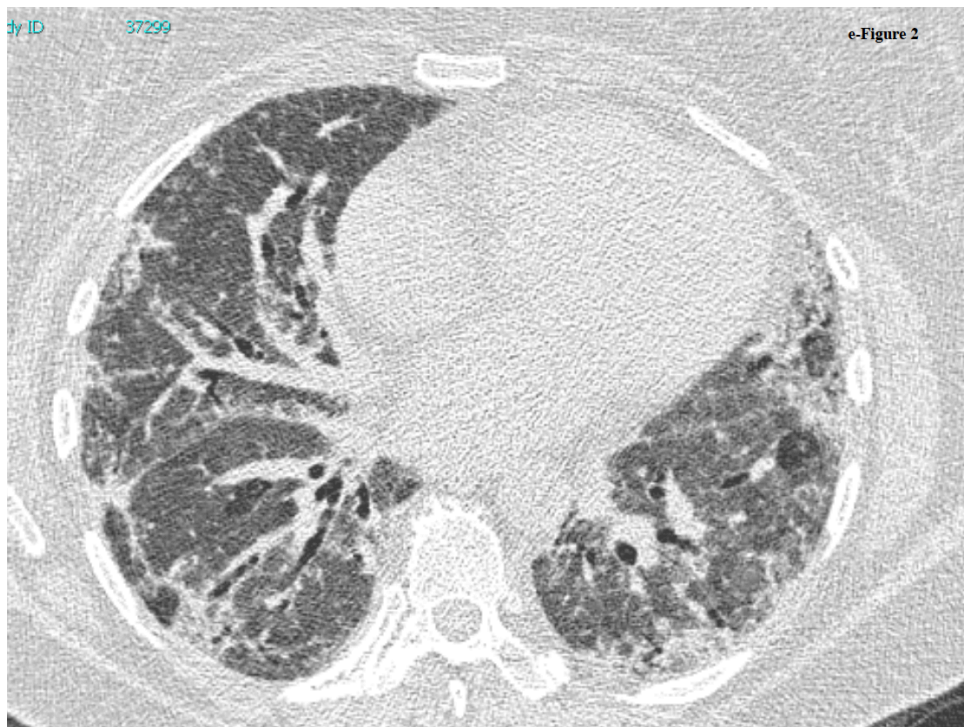

**e-Figure 2.**

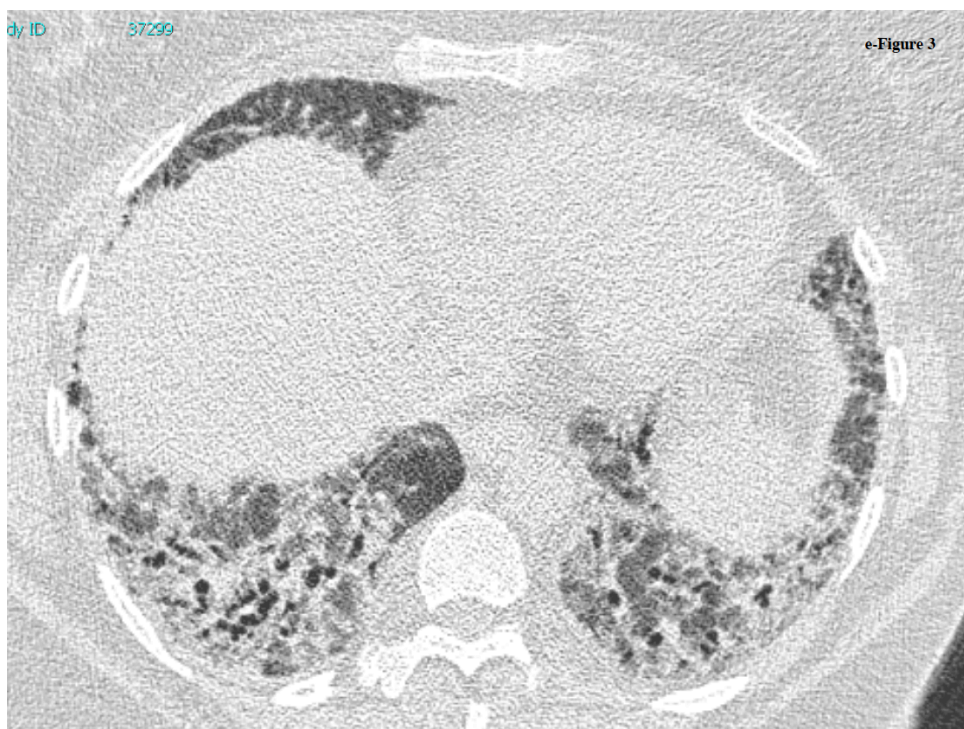

**e-Figure 3.**

*Online supplements are not copyedited prior to posting.*

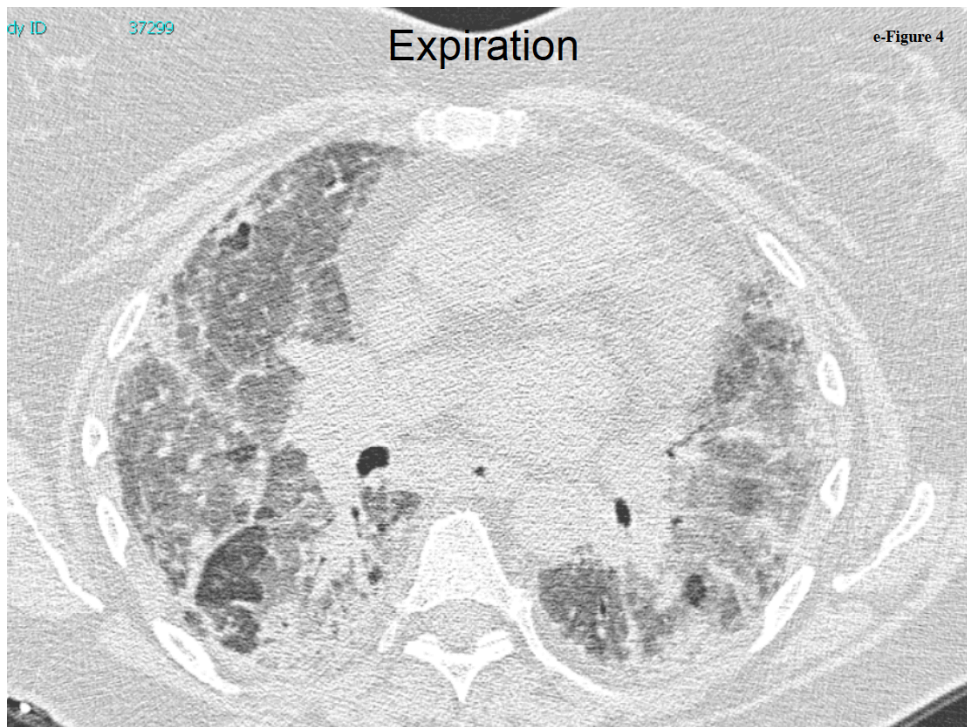

**e-Figure 4.**

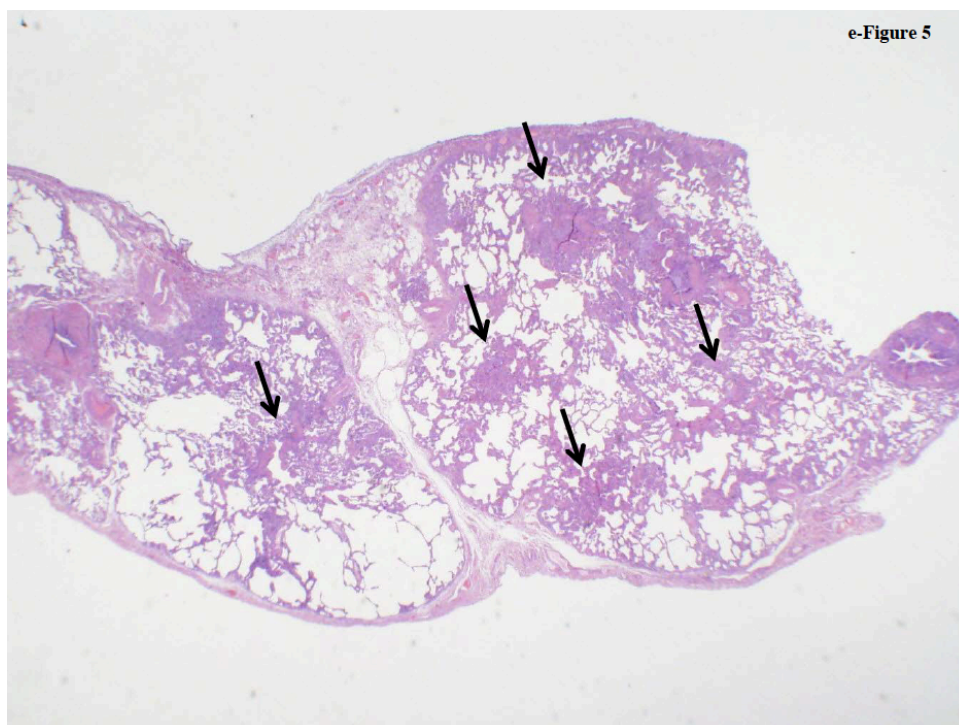

**e-Figure 5.** Scanning power microscopy showing centrilobular inflammation and scarring in one of the lobar biopsies (arrows)

*Online supplements are not copyedited prior to posting.*

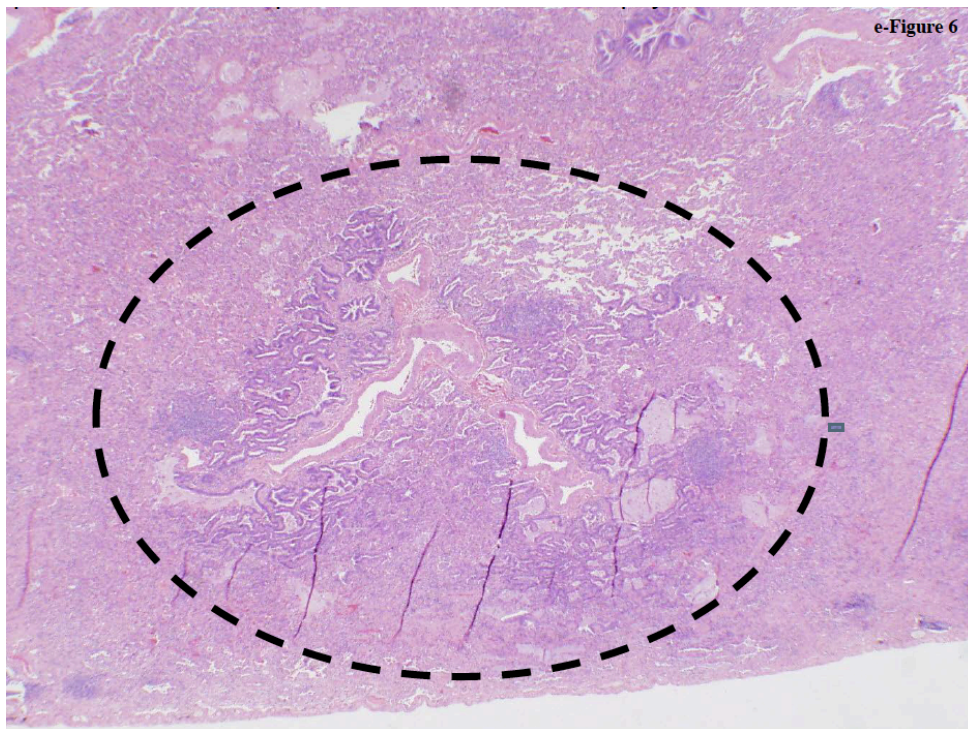

**e-Figure 6.** Scanning power microscopy showing centrilobular scarring with peribronchiolar metaplasia in the other lobar biopsies

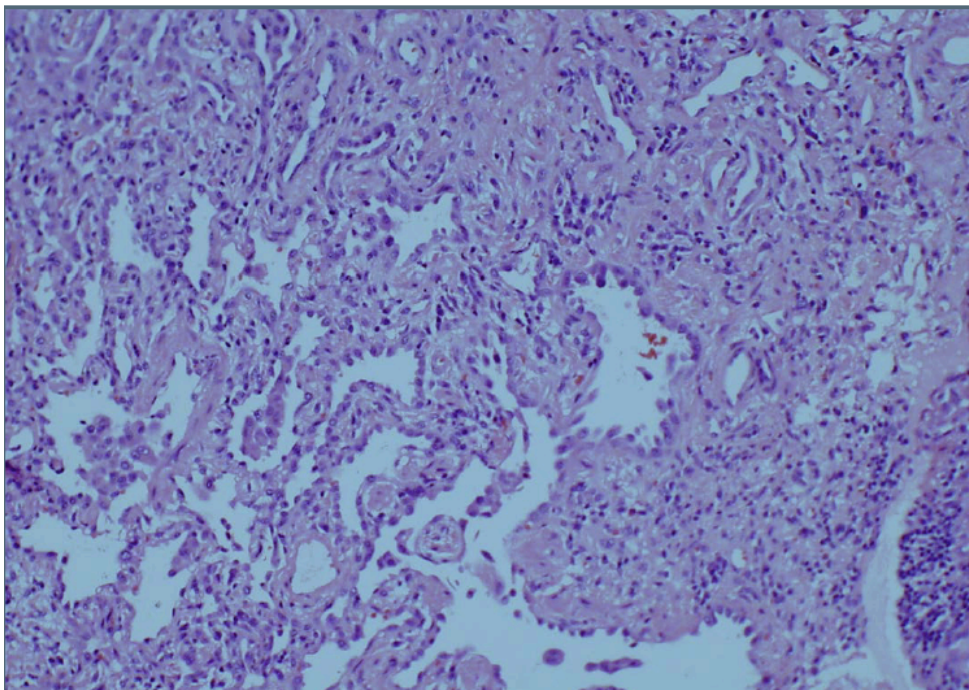

**e-Figure 7.** Medium power microscopy shows interstitial fibrosis; no granulomas are present

*Online supplements are not copyedited prior to posting.*

## **e-Appendix 2. Adjudication Case**

The subject is a 56 year old Caucasian woman presenting with 3 years of progressive dyspnea on exertion. Two years prior, she underwent a surgical lung biopsy that was reported to be consistent with usual interstitial pneumonia. She had a history of essential hypertension and gastroesophageal reflux. She was a never smoker, and had one cat and one lovebird (a small parrot) for approximately 7 years. Her physical examination revealed inspiratory dry crackles at both lung bases. She had severe impairment of lung function with FVC 34% of predicted and DLCO was 34% of predicted.

HRCT Images (Appendix e-1, panels 1-4): diffuse fibrotic changes with evidence of mosaic attenuation and subsegmental air trapping in the expiratory views.

Surgical lung biopsy (Appendix e-1, panels 5-7): patchy areas of well established fibrosis that were predominantly centrilobular and peribronchiolar in distribution.

Adjudication: the combination of indoor exposure to a domestic bird, air trapping in the HRCT images, and biopsy findings with pathological changes predominantly centered around airways is most consistent with a final diagnosis of Chronic Hypersensitivity Pneumonitis.

*Online supplements are not copyedited prior to posting.*

### **e-Appendix 3. ACKNOWLEDGEMENTS**

The following IPFnet members participated in the **STEP-IPF study**:

**Protocol Chairs**—*National Jewish Medical and Research Center*: M. Schwarz; *Sansum Clinic, Santa Barbara*: D.A. Zisman. **IPFnet Steering Committee Chair**—*University of Iowa*: G. Hunninghake. **Clinical Centers**—*Cleveland Clinic*: J. Chapman, M. Olman, S. Lubell; *Duke University Medical Center*: L.D. Morrison, M.P. Steele, T. Haram; *Emory University*: J. Roman, R. Perez, T. Perez; *Mayo Clinic, Rochester*: J.H. Ryu, J.P. Utz, A.H. Limper, C.E. Daniels, K. Meiras, S. Walsh. *National Jewish Health*: K.K. Brown, M. Schwarz, MD, C. Bair, D. Kervitsky; *Tulane University*: J.A. Lasky, S. Ditta. *University of Alabama, Birmingham*: J. de Andrade, V.J. Thannickal, M. Stewart; *University of California, Los Angeles*: D.A. Zisman, J. Lynch, E. Calahan, P. Lopez; *University of California, San Francisco*: T.E. King, Jr., H.R. Collard, J.A. Golden, P.J. Wolters, R. Jeffrey; *University of Chicago*: I. Noth, D.K. Hogarth, N. Sandbo, M.E. Streck, S.R. White, C. Brown, I. Garic, S. Maleckar; *University of Michigan*: F.J. Martinez, K.R. Flaherty, M. Han, B. Moore, G.B. Toews, D. Dahlgren; *University of Washington*: G. Raghu, J. Hayes, M. Snyder; *Vanderbilt University*: J.E. Loyd, L. Lancaster, W. Lawson, R. Greer, W. Mason; *Weill Medical College of Cornell University*: R.J. Kaner, V. Monroy, M. Wang. **Core Lab Chairs**—**Radiology**: *National Jewish Health*: D.A. Lynch; **Pathology**: *Mayo Clinic*: T. Colby. **Data Coordinating Center**—*Duke Clinical Research Institute*: K.J. Anstrom, R.C. Becker, E.L. Eisenstein, N.R. MacIntyre, L.D. Morrison, J. Rochon, M.P. Steele, J.S. Sundry, L. Davidson-Ray, P. Dignacco, R. Edwards, R. Anderson, R. Beci, S. Calvert, K. Cain, T. Gentry-Bumpass, D. Hill, M. Ingham, E. Kagan, J. Kaur, C. Matti, J. McClelland, A. Meredith, T. Nguyen, J. Pesarchick, R.S. Roberts, W. Tate, T. Thomas, J. Walker, D. Whelan, J. Winsor, Q. Yang, E. Yow. **NHLBI**—H.Y. Reynolds, X. Tian, J. Kiley.

The following IPFnet members participated in the **ACE-IPF study**:

**Protocol Chairs**—*University of Chicago*: I. Noth, *Cleveland Clinic*: M. Olman. **IPFnet Steering Committee Chairs**—*University of Colorado*: M. Schwarz; *University of Michigan*: G.B. Toews; *University of Iowa*: G. Hunninghake. **Clinical Centers**—*Cleveland Clinic*: D.A. Culver, J. Chapman, M. Olman, S. Lubell, R. Wehrmann; *Duke University Medical Center*: L.D. Morrison, M.P. Steele, T. Haram, R. Kidd; *Highland Hospital*: M. Kallay, E. Lyda; *Mayo Clinic*: J.H. Ryu, J.P. Utz, A.H. Limper, C.E. Daniels, K. Meiras, S. Walsh; *Medical University of South Carolina*: S. Sahn, N. O'Banner, F. Stokes; *National Jewish Health*: K.K. Brown, C. Bair, D. Kervitsky; *St. Luke's Hospital*: N.A. Ettinger, S. Merli; *University of Alabama at Birmingham*: J. de Andrade, V.J. Thannickal, M. Stewart; *University*

*Online supplements are not copyedited prior to posting.*

of California at Los Angeles: J. Belperio, J.P. Lynch III, E. Calahan, P. Lopez; *University of California at San Francisco*: T.E. King, Jr., H.R. Collard, J. Golden, P. Wolters, A. Eller; *University of Chicago*: I. Noth, D.K. Hogarth, N. Sandbo, M.E. Streck, S. Maleckar, G. Rahimova, L. Sardin, ; *University of Louisville*: J. Roman, R. Perez, T. Perez; *University of Miami Miller School of Medicine*: M. Glassberg, E. Simonet; *University of Michigan*: F.J. Martinez, K. Baumann, K. Chan, A. Chughtai, B. Gross, K.R. Flaherty, M.L. Han, R. Hyzy, E. Kazerooni, B. Moore, J. Myers, G.B. Toews, E. White, D. Dahlgren; *University of Pennsylvania*: M. Rossman, M. Kreider, K. Le; *University of Texas Southwestern*: J. Fitzgerald, C. Glazer; *University of Utah*: M.B. Scholand, L. Brewster, A. Johnson; *University of Washington*: G. Raghu, P. Berry-Bell, A. Snydsman; *Vanderbilt University*: J.E. Loyd, L. Lancaster, W. Lawson, R. Greer, K. Kinser, R. Richardson, W. Mason; *Weill Medical College of Cornell*: R.J. Kaner, K. Bandong; *Yale University*: D. Antin-Ozerkis, C. Holm, J. Estrom. **Core Lab Chairs**—Radiology: *National Jewish Health*: D.A. Lynch; Pathology: *Mayo Clinic*: T. Colby. **Data Coordinating Center**— *Duke Clinical Research Institute*: K.J. Anstrom, E.L. Eisenstein, J.S. Sundy, L. Davidson-Ray, P. Dignacco, R. Edwards, R. Beci, S. Calvert, T. Gentry-Bumpass, D. Hill, P.V. Hofmann, K. Hwang, J. Kaur, C. Matti, A. Meredith, J. Pesarchick, S. Ramey, R.S. Roberts, A. Sharlow, J. Winsor, Q. Yang, E. Yow. **NHLBI**—G.G. Weinmann, H. Reynolds, B. Schmetter, X. Tian, J. Kiley.

The following IPFnet members participated in the **PANTHER-IPF study**:

**Protocol Committee Chairs**—*University of Michigan*: F.J. Martinez, *University of Washington*: G. Raghu. **IPFnet Steering Committee Chairs**—*University of Colorado*: M. Schwarz; *University of Michigan*: G.B. Toews. **Clinical Centers** — *Beth Israel Deaconess*: J. Zibrak, A. Demersky, M. Vey; *Brigham and Women's*: I.O. Rosas, P. Debrosse; *Cleveland Clinic*: D.A. Culver, J. Chapman, M. Olman, S. Lubell, R. Wehrmann; *Duke University Medical Center*: L.D. Morrison, M.P. Steele, T. Haram, R. Kidd; *Highland Hospital*: M. Kallay, E. Lyda; *Mayo Clinic*: J.H. Ryu, J.P. Utz, A.H. Limper, C.E. Daniels, K. Meiras, S. Walsh; *Medical University of South Carolina*: S. Sahn, N. O'Banner, F. Stokes; *Mount Sinai*: M. Padilla, G. Berhanu; *National Jewish Health*: K.K. Brown, C. Bair, D. Kervitsky; *St. Luke's Hospital*: N.A. Ettinger, S. Merli; *Temple University*: G. J. Criner. I.Q. Swift, A. Satti, F. Cordova, N. Patel, K. West, G. Jones; *Tulane University*: J.A. Lasky, S. Ditta; *University of Alabama at Birmingham*: J. de Andrade, V.J. Thannickal, M. Stewart; *University of California at Los Angeles*: J. Belperio, J.P. Lynch III, E. Calahan, P. Lopez; *University of California at San Francisco*: T.E. King, Jr., H.R. Collard, J. Golden, P. Wolters, A. Eller; *University of Chicago*: I. Noth, D.K. Hogarth, N. Sandbo, M.E. Streck, S. Maleckar, G. Rahimova, L. Sardin, ; *University of Louisville*: J. Roman, R. Perez, T. Perez; *University of Miami Miller School of Medicine*: M. Glassberg, E. Simonet; *University of Michigan*: F.J. Martinez, K. Baumann, K. Chan, A. Chughtai, B. Gross, K.R. Flaherty, M.L. Han, R. Hyzy, E. Kazerooni, B. Moore, J. Myers, G.B. Toews, E. White, D. Dahlgren; *University of*

*Online supplements are not copyedited prior to posting.*

The logo for CHEST Online Supplement. It features a stylized icon on the left consisting of three curved, overlapping bands in blue and orange. To the right of the icon, the word "CHEST" is written in a large, bold, black sans-serif font. To the right of "CHEST", the words "Online Supplement" are written in a smaller, blue sans-serif font.

*Pennsylvania*: M. Rossman, M. Kreider, K. Le; *University of Texas Southwestern*: J. Fitzgerald, C. Glazer; *University of Utah*: M.B. Scholand, L. Brewster, A. Johnson; *University of Washington*: G. Raghu, P. Berry-Bell, A. Snydsman; *Vanderbilt University*: J.E. Loyd, L. Lancaster, W. Lawson, R. Greer, W. Mason; *Weill Medical College of Cornell*: R.J. Kaner, K. Bandong; *Yale University*: D. Antin-Ozerkis, C. Holm, J. Estrom.

**Core Lab Chairs**—Radiology: *National Jewish Health*: D.A. Lynch; Pathology: *Mayo Clinic*: T. Colby. **Data Coordinating Center**—*Duke Clinical Research Institute*: K.J. Anstrom, R.C. Becker, E.L. Eisenstein, J.S. Sundy, L. Davidson-Ray, P. Dignacco, R. Edwards, R. Beci, S. Calvert, K. Cain, T. Gentry-Bumpass, D. Hill, K. Huang, J. Kaur, C. Matti, A. Meredith, J. Pesarchick, S. Ramey, R.S. Roberts, A. Sharlow, J. Winsor, E. Yow. **NHLBI**—G.G. Weinmann, H. Reynolds, B. Schmetter, X. Tian, J. Kiley

*Online supplements are not copyedited prior to posting.*
